# Supplementary material
Source: PubMed Central journal article supplement (PMC4783464)
Supplement: cr201611x1.pdf [file cr201611x1.pdf]

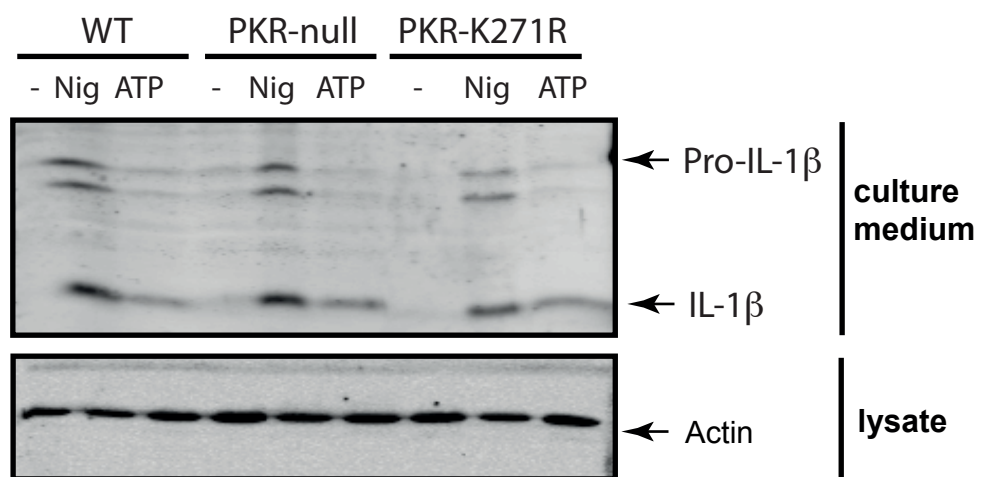

Supplementary Figure 1

**Supplementary Figure 1. PKR-dependent control of inflammasome activity evidenced in peritoneal macrophages is not retained in bone-marrow-derived macrophages.** Detection of the processing of pro-IL-1 $\beta$  in BMDM stimulated with LPS then nigericin or ATP by immunoblot with an anti-IL-1 $\beta$  antibody. Actin is detected as a loading control.
